# Supplementary material for: Genome-wide identification and expression analysis of the monosaccharide transporter (MST) gene family in wheat (Triticum aestivum L.)
Source: Research Square preprint supplement (doi:10.21203/rs.3.rs-7561375/v1), 2025-10-30
Supplement: Supplementary file 1 [file 47e0b4269cee15e815923519.docx]

**Table S1. The primers used in the study**

| Types of primers | Gene name | Forward primer (5'-3') | Reverse primer (5'-3') |
| --- | --- | --- | --- |
| RT-qPCR | *TaERD3* | TGTGATATCCTACACGGTGCC | GGTATCAGGATTGAGCAAGGTAA |
|  | *TaINT2* | TTCTTGCTGACCTGATGTTCG | CAGTGACTGATGCTATTCCCAC |
|  | *TapGlcT1* | GCCAGCTGGTTTGATCTATTC | GACAAGAGTAACATCGACGCC |
|  | *TaPMT27* | ACATCTCGGTGATGAGCGG | GCGAGTAGATGCTGATGATGC |
|  | *TaSTP59* | TGTCCAAGGGCGTGAGC | GCAGCAGGATGACGAAGATG |
|  | *TaSTP60* | GCCACCAGAACAACTACTGCA | CACACCCTGATTGCCGAAA |
|  | *TaTMT9* | TTCACCCTCGGGTTCCTGT | CTCCGCCGTGTCATTGTTC |
|  | *TaVGT2* | GGCGTCCAAGGGCGAG | CGATATGGTGGCACCAGAT |
|  | *Actin* | GTTCCAATCTATGAGGGATACACGC | GAACCTCCACTGAGAACAACATTACC |
| Subcellular localization | *TaERD3* | GGGGTACCATGAGCTTCCGGGACGAGAG | GCTCTAGAACTCTCGTCCCGGAAGCTCAT |
|  | *TaPMT29* | GGGGTACCATGGCGCACGTTGGAGCTT | GCTCTAGAAAAGCTCCAACGTGCGCCAT |
|  | *TaSTP18* | GGGGTACCATGGCGGGCGGCGCCGT | GCTCTAGAAACGGCGCCGCCCGCCAT |

**Table S2. Members and physicochemical properties of TaMST family**

| Accession number | Sequence ID | Number of Amino Acid | Molecular Weight | Theoretical pI | Instability Index | Aliphatic Index | Grand Average of Hydropathicity | Transmembrane domain | Subcellular localization |
| --- | --- | --- | --- | --- | --- | --- | --- | --- | --- |
| TraesCS1A02G405600.1 | *TaERD1* | 496 | 52965.83 | 8.75 | 32.85 | 108.57 | 0.55 | 12 | plasmalemma |
| TraesCS1A02G405800.1 | *TaERD2* | 503 | 53972.35 | 9.3 | 40.69 | 110.54 | 0.59 | 12 | plasmalemma |
| TraesCS1A02G418300.1 | *TaERD3* | 500 | 53355.49 | 8.68 | 42.1 | 108.7 | 0.58 | 12 | plasmalemma |
| TraesCS1B02G435700.1 | *TaERD4* | 496 | 53009.94 | 8.75 | 33.28 | 108.57 | 0.55 | 12 | plasmalemma |
| TraesCS1B02G435900.1 | *TaERD5* | 501 | 53842.19 | 9.37 | 40.32 | 110.98 | 0.59 | 12 | plasmalemma |
| TraesCS1B02G448300.1 | *TaERD6* | 500 | 53307.45 | 8.68 | 43.67 | 109.28 | 0.59 | 12 | plasmalemma |
| TraesCS1D02G413600.1 | *TaERD7* | 496 | 53098.07 | 8.53 | 33.8 | 108.57 | 0.55 | 12 | plasmalemma |
| TraesCS1D02G413700.1 | *TaERD8* | 503 | 53982.31 | 9.37 | 39.85 | 111.31 | 0.59 | 12 | plasmalemma |
| TraesCS1D02G426000.1 | *TaERD9* | 500 | 53351.49 | 8.68 | 43.69 | 109.48 | 0.59 | 12 | plasmalemma |
| TraesCS2A02G046400.1 | *TaERD10* | 477 | 50962.92 | 7.02 | 32.92 | 114.86 | 0.66 | 12 | plasmalemma |
| TraesCS2A02G046600.1 | *TaERD11* | 477 | 50976.95 | 7.02 | 32.92 | 114.86 | 0.66 | 12 | plasmalemma |
| TraesCS2B02G058500.1 | *TaERD12* | 477 | 50962.08 | 6.65 | 32.86 | 115.49 | 0.68 | 12 | plasmalemma |
| TraesCS2B02G058800.1 | *TaERD13* | 393 | 41912.43 | 7.97 | 35.29 | 117.86 | 0.69 | 10 | plasmalemma |
| TraesCS4B02G339600.1 | *TaERD14* | 493 | 52797.02 | 8.53 | 40.87 | 111.4 | 0.6 | 12 | plasmalemma |
| TraesCS4B02G339700.1 | *TaERD15* | 551 | 59129.59 | 8.49 | 40.56 | 109.98 | 0.56 | 12 | plasmalemma |
| TraesCS4B02G339800.1 | *TaERD16* | 491 | 52464.76 | 6.95 | 41.7 | 113.69 | 0.64 | 12 | plasmalemma |
| TraesCS4B02G340000.2 | *TaERD17* | 477 | 51291.39 | 8.17 | 40.44 | 114.53 | 0.63 | 12 | plasmalemma |
| TraesCS4D02G336100.1 | *TaERD18* | 493 | 52720.02 | 7.59 | 38.61 | 112.21 | 0.61 | 12 | plasmalemma |
| TraesCS4D02G336200.1 | *TaERD19* | 488 | 52052.27 | 7.57 | 41.16 | 113.38 | 0.65 | 12 | vacuolar |
| TraesCS4D02G336300.1 | *TaERD20* | 474 | 50854.89 | 8.15 | 38.25 | 112.15 | 0.63 | 12 | plasmalemma |
| TraesCS5A02G293500.1 | *TaERD21* | 480 | 51024 | 8.17 | 34.16 | 114 | 0.71 | 11 | plasmalemma |
| TraesCS5A02G509400.1 | *TaERD22* | 476 | 51060.31 | 8.89 | 38.91 | 115.38 | 0.68 | 12 | plasmalemma |
| TraesCS5A02G509600.1 | *TaERD23* | 481 | 51588.46 | 6.66 | 36.97 | 109.52 | 0.58 | 12 | plasmalemma |
| TraesCS5B02G292600.1 | *TaERD24* | 483 | 51471.36 | 8.89 | 32.1 | 109.86 | 0.64 | 12 | plasmalemma |
| TraesCS5D02G300800.1 | *TaERD25* | 480 | 51128.05 | 8.68 | 34.58 | 112.79 | 0.68 | 11 | plasmalemma |
| TraesCS6A02G331600.1 | *TaERD26* | 439 | 46919.39 | 9.08 | 28.99 | 117.27 | 0.79 | 12 | vacuolar |
| TraesCS6A02G346700.1 | *TaERD27* | 470 | 49537.48 | 8.73 | 31.74 | 110.43 | 0.73 | 12 | vacuolar |
| TraesCS6B02G362400.2 | *TaERD28* | 521 | 55042.58 | 9.49 | 35.32 | 107.91 | 0.58 | 11 | plasmalemma |
| TraesCS6B02G380300.1 | *TaERD29* | 470 | 49516.28 | 6.84 | 34.26 | 113.3 | 0.75 | 11 | vacuolar |
| TraesCS6D02G310900.1 | *TaERD30* | 515 | 54280.82 | 9.53 | 37.48 | 108.95 | 0.61 | 11 | plasmalemma |
| TraesCS6D02G329700.1 | *TaERD31* | 473 | 49779.66 | 6.75 | 35.25 | 114.23 | 0.77 | 11 | vacuolar |
| TraesCSU02G023400.1 | *TaERD32* | 481 | 51274.35 | 7.02 | 32.13 | 115.74 | 0.67 | 12 | plasmalemma |
| TraesCSU02G191400.1 | *TaERD33* | 477 | 51128.27 | 8.4 | 33.41 | 113.84 | 0.64 | 12 | plasmalemma |
| TraesCSU02G196200.1 | *TaERD34* | 457 | 49030.79 | 8.55 | 32.86 | 114.77 | 0.63 | 11 | plasmalemma |
| TraesCS2A02G251600.1 | *TaINT1* | 575 | 61864.85 | 8.86 | 38.88 | 100.26 | 0.38 | 12 | plasmalemma |
| TraesCS2A02G349800.1 | *TaINT2* | 509 | 54269.44 | 5.63 | 37.64 | 110.98 | 0.63 | 12 | plasmalemma |
| TraesCS2A02G385500.1 | *TaINT3* | 581 | 62951.8 | 8.88 | 43.05 | 102.07 | 0.39 | 12 | plasmalemma |
| TraesCS2B02G266000.1 | *TaINT4* | 577 | 61915.94 | 9.03 | 35.63 | 100.24 | 0.38 | 12 | plasmalemma |
| TraesCS2B02G368200.1 | *TaINT5* | 509 | 54313.57 | 5.63 | 37.72 | 110.81 | 0.63 | 12 | plasmalemma |
| TraesCS2B02G402400.1 | *TaINT6* | 581 | 62974.88 | 8.95 | 41.22 | 103.56 | 0.41 | 12 | plasmalemma |
| TraesCS2D02G252400.1 | *TaINT7* | 577 | 61964.97 | 9.09 | 36.85 | 99.22 | 0.37 | 12 | plasmalemma |
| TraesCS2D02G348200.1 | *TaINT8* | 509 | 54315.48 | 5.63 | 38.29 | 110.22 | 0.63 | 12 | plasmalemma |
| TraesCS2D02G382200.1 | *TaINT9* | 581 | 63042.99 | 9.09 | 42.3 | 103.91 | 0.41 | 12 | plasmalemma |
| TraesCS3A02G036600.1 | *TaPGlcT1* | 554 | 57899.46 | 9.45 | 37.67 | 107.11 | 0.49 | 10 | plasmalemma |
| TraesCS3B02G047300.1 | *TaPGlcT2* | 501 | 52989.02 | 8.94 | 31.99 | 115.11 | 0.61 | 12 | plasmalemma |
| TraesCS3D02G043500.1 | *TaPGlcT3* | 501 | 53033.13 | 9 | 33.21 | 114.91 | 0.61 | 12 | plasmalemma |
| TraesCS5A02G202700.1 | *TaPGlcT4* | 552 | 58306.7 | 6.02 | 39.44 | 105.67 | 0.47 | 9 | plasmalemma |
| TraesCS5B02G201200.1 | *TaPGlcT5* | 551 | 58229.65 | 6.1 | 38.32 | 105.32 | 0.47 | 9 | plasmalemma |
| TraesCS5D02G209100.1 | *TaPGlcT6* | 541 | 57243.51 | 5.95 | 38.18 | 106.71 | 0.5 | 9 | plasmalemma |
| TraesCS7A02G516600.1 | *TaPGlcT7* | 489 | 52328.39 | 8.64 | 42.23 | 103.48 | 0.53 | 10 | Endoplasmic reticulum |
| TraesCS7B02G432900.1 | *TaPGlcT8* | 487 | 52172.21 | 8.64 | 43.47 | 103.29 | 0.52 | 10 | Endoplasmic reticulum |
| TraesCS7D02G506800.1 | *TaPGlcT9* | 488 | 52229.26 | 8.64 | 43.19 | 103.07 | 0.52 | 10 | Endoplasmic reticulum |
| TraesCS1A02G426300.1 | *TaPMT1* | 515 | 55007.75 | 8.83 | 31.29 | 105.88 | 0.57 | 10 | plasmalemma |
| TraesCS1B02G460600.1 | *TaPMT2* | 521 | 55607.44 | 8.71 | 32.47 | 105.8 | 0.56 | 11 | plasmalemma |
| TraesCS1B02G460700.1 | *TaPMT3* | 494 | 52734.09 | 8.36 | 31.93 | 107.02 | 0.54 | 10 | plasmalemma |
| TraesCS1D02G435800.1 | *TaPMT4* | 517 | 55300.08 | 8.71 | 31.58 | 105.67 | 0.54 | 10 | plasmalemma |
| TraesCS2A02G188600.1 | *TaPMT5* | 515 | 55179.97 | 9.28 | 29.93 | 109.32 | 0.61 | 10 | plasmalemma |
| TraesCS2A02G188700.1 | *TaPMT6* | 529 | 56411.29 | 9.19 | 36.3 | 103.27 | 0.52 | 10 | vacuolar |
| TraesCS2A02G188900.1 | *TaPMT7* | 488 | 51860.83 | 5.33 | 38.8 | 112.91 | 0.64 | 11 | plasmalemma |
| TraesCS2A02G189000.1 | *TaPMT8* | 531 | 56470.34 | 6.47 | 34.14 | 111.83 | 0.64 | 12 | plasmalemma |
| TraesCS2A02G373200.1 | *TaPMT9* | 537 | 57903.73 | 5.58 | 44.49 | 106.82 | 0.45 | 9 | plasmalemma |
| TraesCS2A02G590400.1 | *TaPMT10* | 465 | 48518.61 | 6.04 | 42.86 | 113.68 | 0.66 | 9 | plasmalemma |
| TraesCS2B02G218300.1 | *TaPMT11* | 521 | 55297.92 | 5.54 | 31.58 | 112.32 | 0.63 | 12 | plasmalemma |
| TraesCS2B02G218400.1 | *TaPMT12* | 516 | 54655.12 | 5.49 | 34.78 | 110.78 | 0.65 | 12 | plasmalemma |
| TraesCS2B02G218600.1 | *TaPMT13* | 558 | 59744.21 | 9.2 | 38.04 | 102.44 | 0.49 | 10 | plasmalemma |
| TraesCS2B02G218700.1 | *TaPMT14* | 565 | 60406.9 | 9.66 | 34.12 | 105.36 | 0.5 | 11 | plasmalemma |
| TraesCS2B02G390300.1 | *TaPMT15* | 540 | 58209.08 | 5.58 | 44.23 | 106.41 | 0.45 | 9 | plasmalemma |
| TraesCS2B02G593500.1 | *TaPMT16* | 522 | 55334.64 | 8.15 | 46.74 | 112.84 | 0.6 | 10 | plasmalemma |
| TraesCS2B02G594000.1 | *TaPMT17* | 513 | 53845.12 | 7.09 | 38.37 | 118.65 | 0.67 | 11 | plasmalemma |
| TraesCS2D02G198700.1 | *TaPMT18* | 521 | 55237.84 | 5.39 | 34.63 | 111.57 | 0.63 | 12 | plasmalemma |
| TraesCS2D02G198800.1 | *TaPMT19* | 516 | 54702.28 | 5.67 | 35.77 | 111.36 | 0.66 | 12 | plasmalemma |
| TraesCS2D02G198900.1 | *TaPMT20* | 529 | 56548.51 | 9.18 | 35.27 | 102.53 | 0.5 | 10 | vacuolar |
| TraesCS2D02G199100.1 | *TaPMT21* | 514 | 55050.87 | 9.21 | 30.49 | 109.73 | 0.62 | 10 | plasmalemma |
| TraesCS2D02G369400.1 | *TaPMT22* | 537 | 57949.76 | 5.58 | 44.49 | 106.44 | 0.44 | 9 | plasmalemma |
| TraesCS2D02G564100.1 | *TaPMT23* | 536 | 56409.69 | 6.15 | 45.63 | 111.9 | 0.59 | 10 | plasmalemma |
| TraesCS2D02G564400.1 | *TaPMT24* | 534 | 55529.09 | 7.66 | 36.84 | 116.37 | 0.67 | 12 | plasmalemma |
| TraesCS3B02G096700.1 | *TaPMT25* | 530 | 56742.71 | 9.04 | 35.97 | 103.25 | 0.5 | 10 | plasmalemma |
| TraesCS4A02G042000.1 | *TaPMT26* | 519 | 55116.29 | 8.25 | 42.96 | 108.11 | 0.45 | 10 | plasmalemma |
| TraesCS4A02G042100.1 | *TaPMT27* | 521 | 56069.68 | 7.59 | 46.18 | 103.05 | 0.46 | 12 | vacuolar |
| TraesCS4A02G251900.1 | *TaPMT28* | 475 | 50158.98 | 8.5 | 44.88 | 111.18 | 0.68 | 12 | plasmalemma |
| TraesCS4B02G062900.1 | *TaPMT29* | 475 | 49965.92 | 8.67 | 44.27 | 112.82 | 0.73 | 12 | plasmalemma |
| TraesCS4B02G262800.1 | *TaPMT30* | 519 | 54891.99 | 8.24 | 43.96 | 107.94 | 0.47 | 10 | vacuolar |
| TraesCS4B02G262900.1 | *TaPMT31* | 520 | 55970.59 | 7.59 | 46.28 | 102.87 | 0.46 | 12 | vacuolar |
| TraesCS4D02G061900.1 | *TaPMT32* | 475 | 50132.99 | 8.72 | 44.3 | 110.78 | 0.69 | 12 | plasmalemma |
| TraesCS4D02G262900.1 | *TaPMT33* | 519 | 55038.24 | 7.7 | 42.05 | 108.13 | 0.48 | 10 | vacuolar |
| TraesCS4D02G263000.1 | *TaPMT34* | 521 | 56149.77 | 6.92 | 45.81 | 103.05 | 0.46 | 12 | vacuolar |
| TraesCS5A02G102500.1 | *TaPMT35* | 486 | 50643.82 | 6.01 | 36.09 | 106.28 | 0.57 | 9 | plasmalemma |
| TraesCS5A02G440100.1 | *TaPMT36* | 505 | 52875.87 | 9.11 | 40.48 | 108 | 0.56 | 12 | plasmalemma |
| TraesCS5B02G106800.1 | *TaPMT37* | 483 | 50596.01 | 5.61 | 36.96 | 108.14 | 0.63 | 10 | vacuolar |
| TraesCS5B02G106900.1 | *TaPMT38* | 508 | 52774.31 | 8.56 | 43.74 | 105.37 | 0.55 | 12 | plasmalemma |
| TraesCS5B02G443900.1 | *TaPMT39* | 505 | 53079.3 | 9.19 | 38.98 | 109.72 | 0.58 | 12 | plasmalemma |
| TraesCS5D02G114300.1 | *TaPMT40* | 488 | 50974.45 | 7.68 | 36.39 | 106.43 | 0.61 | 10 | vacuolar |
| TraesCS5D02G114400.1 | *TaPMT41* | 521 | 54117.83 | 8.96 | 42.28 | 105.57 | 0.55 | 12 | plasmalemma |
| TraesCS5D02G447300.1 | *TaPMT42* | 505 | 52789.94 | 9.11 | 37.87 | 110.12 | 0.61 | 12 | plasmalemma |
| TraesCS7A02G154500.1 | *TaPMT43* | 515 | 54194.73 | 9.24 | 43.72 | 110.64 | 0.6 | 12 | plasmalemma |
| TraesCS7A02G430500.1 | *TaPMT44* | 473 | 49863.69 | 8.47 | 42.7 | 112.49 | 0.73 | 12 | plasmalemma |
| TraesCS7B02G058500.1 | *TaPMT45* | 514 | 54138.66 | 8.96 | 43.87 | 111.81 | 0.61 | 12 | plasmalemma |
| TraesCS7B02G330800.1 | *TaPMT46* | 473 | 49805.81 | 8.63 | 39.75 | 118.44 | 0.8 | 12 | plasmalemma |
| TraesCS7D02G154700.1 | *TaPMT47* | 514 | 54158.61 | 9.06 | 45.52 | 110.88 | 0.58 | 12 | plasmalemma |
| TraesCS7D02G422500.1 | *TaPMT48* | 474 | 50022.09 | 8.93 | 43.64 | 111.84 | 0.72 | 12 | plasmalemma |
| TraesCS1A02G064900.1 | *TaSTP1* | 525 | 56570.73 | 9.36 | 40.4 | 106.82 | 0.67 | 12 | plasmalemma |
| TraesCS1A02G219500.1 | *TaSTP2* | 510 | 55981.93 | 9.09 | 38.3 | 107.06 | 0.52 | 12 | plasmalemma |
| TraesCS1A02G341100.1 | *TaSTP3* | 511 | 56262.22 | 9.18 | 34.76 | 104.05 | 0.53 | 10 | plasmalemma |
| TraesCS1B02G232900.1 | *TaSTP4* | 521 | 57411.51 | 9.11 | 38.47 | 104.63 | 0.49 | 11 | plasmalemma |
| TraesCS1B02G353800.1 | *TaSTP5* | 511 | 56252.24 | 9.17 | 35.04 | 103.29 | 0.53 | 9 | plasmalemma |
| TraesCS1B02G454800.1 | *TaSTP6* | 504 | 54487.21 | 9.16 | 36.61 | 106.01 | 0.61 | 10 | vacuolar |
| TraesCS1D02G065700.1 | *TaSTP7* | 524 | 56637.65 | 9.01 | 40.22 | 105.73 | 0.64 | 10 | plasmalemma |
| TraesCS1D02G221100.1 | *TaSTP8* | 521 | 57257.41 | 9.11 | 35.96 | 106.12 | 0.5 | 12 | plasmalemma |
| TraesCS1D02G343200.1 | *TaSTP9* | 511 | 56238.21 | 9.17 | 34.71 | 103.09 | 0.53 | 10 | plasmalemma |
| TraesCS2A02G205500.1 | *TaSTP10* | 526 | 57451.69 | 9.2 | 36.75 | 102.72 | 0.55 | 11 | plasmalemma |
| TraesCS2A02G259500.1 | *TaSTP11* | 517 | 56293.39 | 9.57 | 36.93 | 106.56 | 0.55 | 11 | plasmalemma |
| TraesCS2A02G340600.1 | *TaSTP12* | 510 | 54595.28 | 9.53 | 31.46 | 101.78 | 0.63 | 11 | vacuolar |
| TraesCS2A02G340700.1 | *TaSTP13* | 514 | 55475.4 | 9.61 | 34.55 | 104.18 | 0.57 | 11 | plasmalemma |
| TraesCS2A02G340800.1 | *TaSTP14* | 515 | 56147.76 | 9.74 | 42.91 | 101.09 | 0.53 | 12 | vacuolar |
| TraesCS2A02G340900.1 | *TaSTP15* | 507 | 54258.81 | 9.51 | 32.29 | 101.97 | 0.58 | 11 | vacuolar |
| TraesCS2A02G341400.1 | *TaSTP16* | 513 | 54319.46 | 9.7 | 30.92 | 103.12 | 0.62 | 12 | vacuolar |
| TraesCS2B02G232900.1 | *TaSTP17* | 526 | 57517.75 | 9.18 | 35.93 | 101.79 | 0.55 | 11 | plasmalemma |
| TraesCS2B02G282400.1 | *TaSTP18* | 517 | 56295.4 | 9.51 | 36.6 | 106.75 | 0.56 | 11 | plasmalemma |
| TraesCS2B02G338400.1 | *TaSTP19* | 510 | 54595.32 | 9.51 | 31.04 | 102.18 | 0.63 | 11 | vacuolar |
| TraesCS2B02G338500.1 | *TaSTP20* | 514 | 55518.41 | 9.58 | 33.3 | 104.92 | 0.58 | 11 | plasmalemma |
| TraesCS2B02G338600.1 | *TaSTP21* | 457 | 50177.98 | 10.02 | 42.05 | 105.19 | 0.53 | 11 | plasmalemma |
| TraesCS2B02G338700.1 | *TaSTP22* | 541 | 58109.4 | 9.6 | 32.85 | 100.81 | 0.56 | 13 | vacuolar |
| TraesCS2B02G339100.1 | *TaSTP23* | 513 | 54223.42 | 9.83 | 30.32 | 103.86 | 0.64 | 12 | vacuolar |
| TraesCS2D02G318200.1 | *TaSTP24* | 510 | 54482.16 | 9.61 | 32.33 | 101.63 | 0.64 | 11 | vacuolar |
| TraesCS2D02G318300.1 | *TaSTP25* | 514 | 55611.58 | 9.58 | 35.12 | 104.73 | 0.57 | 11 | plasmalemma |
| TraesCS2D02G318400.1 | *TaSTP26* | 515 | 56333.05 | 9.68 | 42.44 | 104.47 | 0.54 | 11 | plasmalemma |
| TraesCS2D02G318500.1 | *TaSTP27* | 507 | 54307.91 | 9.67 | 31.7 | 102.17 | 0.58 | 11 | vacuolar |
| TraesCS2D02G319100.1 | *TaSTP28* | 513 | 54227.41 | 9.75 | 29.03 | 102.94 | 0.64 | 12 | vacuolar |
| TraesCS3A02G102800.1 | *TaSTP29* | 510 | 54621.89 | 9.37 | 35.72 | 107.12 | 0.54 | 11 | vacuolar |
| TraesCS3A02G475200.1 | *TaSTP30* | 508 | 55668.52 | 9.59 | 36.85 | 103.25 | 0.49 | 11 | plasmalemma |
| TraesCS3B02G120300.1 | *TaSTP31* | 461 | 49819.57 | 9.36 | 37.26 | 113.41 | 0.58 | 10 | plasmalemma |
| TraesCS3B02G518800.1 | *TaSTP32* | 508 | 55634.54 | 9.54 | 36.39 | 103.07 | 0.51 | 11 | plasmalemma |
| TraesCS3B02G518900.1 | *TaSTP33* | 514 | 55828.69 | 9.41 | 30.41 | 106.23 | 0.57 | 11 | plasmalemma |
| TraesCS3D02G105000.1 | *TaSTP34* | 512 | 54794.99 | 9.18 | 36.46 | 107.29 | 0.54 | 11 | vacuolar |
| TraesCS3D02G470200.1 | *TaSTP35* | 514 | 55828.69 | 9.41 | 30.65 | 106.23 | 0.57 | 11 | plasmalemma |
| TraesCS3D02G470300.1 | *TaSTP36* | 508 | 55361.07 | 9.39 | 35.53 | 103.82 | 0.52 | 11 | plasmalemma |
| TraesCS4A02G066200.1 | *TaSTP37* | 515 | 56895.59 | 8.96 | 40.25 | 109.42 | 0.46 | 11 | plasmalemma |
| TraesCS4A02G314900.1 | *TaSTP38* | 514 | 55928.32 | 9.28 | 41.45 | 108.58 | 0.64 | 12 | plasmalemma |
| TraesCS4A02G384900.1 | *TaSTP39* | 513 | 54276.4 | 9.84 | 35.65 | 101.54 | 0.54 | 12 | vacuolar |
| TraesCS4B02G243500.1 | *TaSTP40* | 514 | 56691.44 | 8.95 | 38.32 | 109.82 | 0.49 | 11 | plasmalemma |
| TraesCS4B02G346400.1 | *TaSTP41* | 517 | 55012.72 | 9.92 | 32.99 | 103.64 | 0.62 | 10 | plasmalemma |
| TraesCS4B02G371700.1 | *TaSTP42* | 524 | 57000.07 | 8.99 | 35.56 | 106.41 | 0.57 | 11 | plasmalemma |
| TraesCS4D02G243100.1 | *TaSTP43* | 514 | 56700.45 | 8.95 | 38.32 | 109.82 | 0.49 | 11 | plasmalemma |
| TraesCS4D02G341400.1 | *TaSTP44* | 515 | 54873.63 | 10.05 | 31.35 | 102.72 | 0.62 | 10 | plasmalemma |
| TraesCS4D02G365800.1 | *TaSTP45* | 526 | 57242.43 | 9.06 | 32.57 | 106.37 | 0.56 | 11 | plasmalemma |
| TraesCS5A02G001100.1 | *TaSTP46* | 516 | 56275.67 | 9.33 | 40.81 | 108.68 | 0.63 | 11 | vacuolar |
| TraesCS5A02G182600.1 | *TaSTP47* | 529 | 57471.37 | 9.07 | 34.07 | 109.43 | 0.56 | 12 | plasmalemma |
| TraesCS5A02G226500.1 | *TaSTP48* | 521 | 56550.61 | 9.26 | 39.92 | 104.8 | 0.5 | 11 | plasmalemma |
| TraesCS5A02G226700.1 | *TaSTP49* | 520 | 56296.49 | 9.06 | 38.32 | 109.4 | 0.61 | 12 | plasmalemma |
| TraesCS5A02G226800.1 | *TaSTP50* | 528 | 57293.43 | 8.79 | 40.94 | 104.05 | 0.53 | 12 | plasmalemma |
| TraesCS5A02G515200.1 | *TaSTP51* | 515 | 54993.74 | 9.98 | 33.61 | 103.09 | 0.62 | 10 | plasmalemma |
| TraesCS5A02G542600.2 | *TaSTP52* | 526 | 57263.46 | 8.98 | 32.9 | 106.37 | 0.56 | 11 | plasmalemma |
| TraesCS5B02G001000.1 | *TaSTP53* | 517 | 56049.39 | 9.16 | 40.44 | 110.35 | 0.65 | 11 | vacuolar |
| TraesCS5B02G180800.1 | *TaSTP54* | 528 | 57434.28 | 8.86 | 35.49 | 110.02 | 0.54 | 10 | plasmalemma |
| TraesCS5B02G225100.1 | *TaSTP55* | 520 | 56387.49 | 9.34 | 39.97 | 104.63 | 0.51 | 11 | plasmalemma |
| TraesCS5B02G225300.1 | *TaSTP56* | 513 | 55762.82 | 9.05 | 38.74 | 108.03 | 0.57 | 10 | plasmalemma |
| TraesCS5B02G225400.1 | *TaSTP57* | 528 | 57274.42 | 8.78 | 40.59 | 104.6 | 0.55 | 12 | plasmalemma |
| TraesCS5D02G001600.1 | *TaSTP58* | 517 | 56210.49 | 9.27 | 41.8 | 109.05 | 0.62 | 11 | vacuolar |
| TraesCS5D02G187100.1 | *TaSTP59* | 529 | 57446.3 | 8.97 | 34.82 | 109.64 | 0.54 | 10 | plasmalemma |
| TraesCS5D02G233900.1 | *TaSTP60* | 520 | 56468.56 | 9.26 | 40.67 | 104.44 | 0.5 | 11 | plasmalemma |
| TraesCS5D02G234100.1 | *TaSTP61* | 520 | 56437.66 | 9.23 | 38.49 | 108.46 | 0.58 | 12 | plasmalemma |
| TraesCS5D02G234200.1 | *TaSTP62* | 528 | 57306.47 | 8.9 | 40.94 | 104.22 | 0.53 | 12 | plasmalemma |
| TraesCS5D02G549900.1 | *TaSTP63* | 514 | 55947.29 | 9.2 | 40.29 | 107.24 | 0.62 | 12 | plasmalemma |
| TraesCS5D02G558100.1 | *TaSTP64* | 504 | 55155.57 | 9.62 | 42.07 | 110.73 | 0.6 | 11 | plasmalemma |
| TraesCS6A02G134000.1 | *TaSTP65* | 523 | 57274.17 | 8.57 | 37.13 | 103.14 | 0.58 | 12 | plasmalemma |
| TraesCS6A02G231700.1 | *TaSTP66* | 509 | 55079.78 | 8.9 | 40.7 | 111.71 | 0.66 | 12 | vacuolar |
| TraesCS6B02G162200.1 | *TaSTP67* | 523 | 57405.33 | 8.43 | 37.44 | 102.75 | 0.58 | 11 | plasmalemma |
| TraesCS6B02G384700.1 | *TaSTP68* | 525 | 58339.28 | 8.81 | 40.03 | 104.32 | 0.4 | 11 | plasmalemma |
| TraesCS6D02G123300.1 | *TaSTP69* | 523 | 57265.18 | 8.42 | 36.8 | 102.94 | 0.59 | 12 | plasmalemma |
| TraesCS7A02G085900.1 | *TaSTP70* | 514 | 54450.71 | 9.89 | 34.21 | 101.36 | 0.54 | 10 | plasmalemma |
| TraesCS7A02G288800.1 | *TaSTP71* | 511 | 55381.06 | 8.44 | 39.78 | 107.28 | 0.63 | 12 | vacuolar |
| TraesCS7B02G185800.1 | *TaSTP72* | 511 | 55328.01 | 8.59 | 39.8 | 107.08 | 0.63 | 12 | vacuolar |
| TraesCS7D02G080200.1 | *TaSTP73* | 512 | 54123.32 | 9.92 | 33.94 | 104.59 | 0.57 | 12 | vacuolar |
| TraesCS7D02G286600.1 | *TaSTP74* | 511 | 55372.05 | 8.64 | 39.46 | 106.89 | 0.63 | 12 | vacuolar |
| TraesCS1A02G201600.1 | *TaTMT1* | 591 | 63028.23 | 4.9 | 40.63 | 119.27 | 0.65 | 10 | vacuolar |
| TraesCS1B02G215800.3 | *TaTMT2* | 591 | 63028.23 | 4.9 | 41.23 | 119.27 | 0.65 | 10 | vacuolar |
| TraesCS2A02G204900.1 | *TaTMT3* | 527 | 56530.6 | 5.82 | 54.12 | 95.94 | 0.49 | 11 | Endoplasmic reticulum |
| TraesCS2A02G483400.1 | *TaTMT4* | 516 | 54650.83 | 8.25 | 38.64 | 106.59 | 0.54 | 9 | plasmalemma |
| TraesCS2A02G483500.1 | *TaTMT5* | 527 | 55569.51 | 5.54 | 31.58 | 101.06 | 0.52 | 10 | plasmalemma |
| TraesCS2A02G483700.1 | *TaTMT6* | 516 | 55257.78 | 6.66 | 39.69 | 103 | 0.56 | 11 | plasmalemma |
| TraesCS2A02G483900.1 | *TaTMT7* | 515 | 55006.42 | 6.6 | 40.16 | 101.9 | 0.56 | 12 | Endoplasmic reticulum |
| TraesCS2A02G484000.1 | *TaTMT8* | 516 | 55264.81 | 7.42 | 32.7 | 104.46 | 0.59 | 10 | plasmalemma |
| TraesCS2B02G232400.1 | *TaTMT9* | 527 | 56526.54 | 5.82 | 53.54 | 94.67 | 0.48 | 11 | Endoplasmic reticulum |
| TraesCS2B02G509700.1 | *TaTMT10* | 519 | 54875.95 | 7.97 | 40.91 | 104.68 | 0.52 | 10 | plasmalemma |
| TraesCS2B02G510000.1 | *TaTMT11* | 516 | 55353.9 | 8.18 | 39.05 | 103 | 0.52 | 11 | plasmalemma |
| TraesCS2B02G510100.1 | *TaTMT12* | 517 | 55226.65 | 6.03 | 41.28 | 102.07 | 0.57 | 12 | plasmalemma |
| TraesCS2D02G211100.1 | *TaTMT13* | 527 | 56527.61 | 6.02 | 53.02 | 95.58 | 0.48 | 11 | Endoplasmic reticulum |
| TraesCS2D02G483300.1 | *TaTMT14* | 516 | 54873.01 | 7.97 | 40.75 | 105.27 | 0.53 | 10 | plasmalemma |
| TraesCS2D02G483500.1 | *TaTMT15* | 520 | 55796.49 | 6.6 | 37.01 | 105.56 | 0.58 | 12 | plasmalemma |
| TraesCS2D02G483600.1 | *TaTMT16* | 515 | 55137.64 | 7.02 | 42.58 | 105.86 | 0.55 | 11 | plasmalemma |
| TraesCS2D02G483700.1 | *TaTMT17* | 518 | 55292.86 | 6.92 | 40.11 | 102.26 | 0.58 | 11 | plasmalemma |
| TraesCS2D02G483800.1 | *TaTMT18* | 516 | 55457.12 | 7 | 31.61 | 103.33 | 0.59 | 10 | plasmalemma |
| TraesCS4A02G326900.1 | *TaTMT19* | 515 | 54996.88 | 8.66 | 52.26 | 96.5 | 0.49 | 11 | Endoplasmic reticulum |
| TraesCS5A02G549500.1 | *TaTMT20* | 514 | 55792.95 | 6.15 | 44.55 | 96.34 | 0.45 | 10 | plasmalemma |
| TraesCS1A02G197200.1 | *TaVGT1* | 495 | 52718.25 | 6.82 | 37.44 | 118.42 | 0.74 | 12 | plasmalemma |
| TraesCS1B02G211800.1 | *TaVGT2* | 495 | 52714.22 | 6.74 | 38.08 | 117.43 | 0.73 | 12 | plasmalemma |
| TraesCS1D02G200700.1 | *TaVGT3* | 495 | 52698.22 | 6.74 | 37.83 | 117.84 | 0.74 | 12 | plasmalemma |
| TraesCS5A02G484700.1 | *TaVGT4* | 567 | 59755.02 | 9.65 | 38.59 | 112.61 | 0.53 | 11 | Chloroplast thylakoid membrane |
| TraesCS5B02G498000.1 | *TaVGT5* | 496 | 52096.98 | 8.32 | 33.62 | 116.47 | 0.65 | 11 | plasmalemma |
| TraesCS5D02G498200.1 | *TaVGT6* | 565 | 59448.62 | 9.67 | 38.73 | 112.32 | 0.52 | 11 | Chloroplast thylakoid membrane |

**Table3 Ka/Ks of repeated events in wheat *TaMST* genes**

| Seq_1 | Seq_2 | Ka | Ks | Ka/Ks | EffectiveLen | AverageS-sites | AverageN-sites | cN | cS | pN | pS |
| --- | --- | --- | --- | --- | --- | --- | --- | --- | --- | --- | --- |
| TraesCS1A02G405600.1 | TraesCS1B02G435700.1 | 0.0027 | 0.1381 | 0.0197 | 1488 | 380.6667 | 1107.3333 | 3.0000 | 48.0000 | 0.0027 | 0.1261 |
| TraesCS1A02G405600.1 | TraesCS1D02G413600.1 | 0.0036 | 0.1321 | 0.0274 | 1488 | 379.6667 | 1108.3333 | 4.0000 | 46.0000 | 0.0036 | 0.1212 |
| TraesCS4B02G339600.1 | TraesCS5A02G509400.1 | 0.0320 | 0.1711 | 0.1872 | 1425 | 356.3333 | 1068.6667 | 33.5000 | 54.5000 | 0.0313 | 0.1529 |
| TraesCS5A02G293500.1 | TraesCS5B02G292600.1 | 0.0479 | 0.0635 | 0.7538 | 1440 | 361.4167 | 1078.5833 | 50.0000 | 22.0000 | 0.0464 | 0.0609 |
| TraesCS5A02G293500.1 | TraesCS5D02G300800.1 | 0.0122 | 0.0543 | 0.2243 | 1440 | 363.0000 | 1077.0000 | 13.0000 | 19.0000 | 0.0121 | 0.0523 |
| TraesCS5B02G292600.1 | TraesCS5D02G300800.1 | 0.0488 | 0.0605 | 0.8070 | 1440 | 361.2500 | 1078.7500 | 51.0000 | 21.0000 | 0.0473 | 0.0581 |
| TraesCS6A02G331600.1 | TraesCS6B02G362400.2 | 0.0177 | 0.0509 | 0.3478 | 1317 | 345.4167 | 971.5833 | 17.0000 | 17.0000 | 0.0175 | 0.0492 |
| TraesCS6A02G331600.1 | TraesCS6D02G310900.1 | 0.0156 | 0.0385 | 0.4056 | 1317 | 346.4167 | 970.5833 | 15.0000 | 13.0000 | 0.0155 | 0.0375 |
| TraesCS6A02G346700.1 | TraesCS6B02G380300.1 | 0.0164 | 0.1433 | 0.1143 | 1410 | 360.4167 | 1049.5833 | 17.0000 | 47.0000 | 0.0162 | 0.1304 |
| TraesCS6A02G346700.1 | TraesCS6D02G329700.1 | 0.0252 | 0.1200 | 0.2101 | 1410 | 360.8333 | 1049.1667 | 26.0000 | 40.0000 | 0.0248 | 0.1109 |
| TraesCS6B02G362400.2 | TraesCS6D02G310900.1 | 0.0198 | 0.0678 | 0.2913 | 1545 | 416.5000 | 1128.5000 | 22.0000 | 27.0000 | 0.0195 | 0.0648 |
| TraesCS6B02G380300.1 | TraesCS6D02G329700.1 | 0.0262 | 0.1068 | 0.2453 | 1410 | 361.5833 | 1048.4167 | 27.0000 | 36.0000 | 0.0258 | 0.0996 |
| TraesCS1A02G418300.1 | TraesCS1B02G448300.1 | 0.0054 | 0.0896 | 0.0599 | 1500 | 378.7500 | 1121.2500 | 6.0000 | 32.0000 | 0.0054 | 0.0845 |
| TraesCS1A02G418300.1 | TraesCS1D02G426000.1 | 0.0018 | 0.0721 | 0.0248 | 1500 | 378.2500 | 1121.7500 | 2.0000 | 26.0000 | 0.0018 | 0.0687 |
| TraesCS1B02G435700.1 | TraesCS1D02G413600.1 | 0.0045 | 0.1482 | 0.0305 | 1488 | 379.3333 | 1108.6667 | 5.0000 | 51.0000 | 0.0045 | 0.1344 |
| TraesCS1B02G448300.1 | TraesCS1D02G426000.1 | 0.0054 | 0.0837 | 0.0642 | 1500 | 378.8333 | 1121.1667 | 6.0000 | 30.0000 | 0.0054 | 0.0792 |
| TraesCS2A02G349800.1 | TraesCS2B02G368200.1 | 0.0067 | 0.1219 | 0.0546 | 1527 | 395.5000 | 1131.5000 | 7.5000 | 44.5000 | 0.0066 | 0.1125 |
| TraesCS2A02G349800.1 | TraesCS2D02G348200.1 | 0.0044 | 0.0796 | 0.0557 | 1527 | 397.0833 | 1129.9167 | 5.0000 | 30.0000 | 0.0044 | 0.0756 |
| TraesCS2A02G385500.1 | TraesCS2B02G402400.1 | 0.0218 | 0.0738 | 0.2958 | 1743 | 441.1667 | 1301.8333 | 28.0000 | 31.0000 | 0.0215 | 0.0703 |
| TraesCS2A02G385500.1 | TraesCS2D02G382200.1 | 0.0175 | 0.0825 | 0.2119 | 1743 | 441.5000 | 1301.5000 | 22.5000 | 34.5000 | 0.0173 | 0.0781 |
| TraesCS2B02G266000.1 | TraesCS2D02G252400.1 | 0.0095 | 0.0381 | 0.2492 | 1731 | 458.0000 | 1273.0000 | 12.0000 | 17.0000 | 0.0094 | 0.0371 |
| TraesCS2B02G368200.1 | TraesCS2D02G348200.1 | 0.0075 | 0.1310 | 0.0576 | 1527 | 395.2500 | 1131.7500 | 8.5000 | 47.5000 | 0.0075 | 0.1202 |
| TraesCS2B02G402400.1 | TraesCS2D02G382200.1 | 0.0093 | 0.0788 | 0.1178 | 1743 | 441.3333 | 1301.6667 | 12.0000 | 33.0000 | 0.0092 | 0.0748 |
| TraesCS5A02G202700.1 | TraesCS5B02G201200.1 | 0.0090 | 0.0439 | 0.2048 | 1653 | 422.0833 | 1230.9167 | 11.0000 | 18.0000 | 0.0089 | 0.0426 |
| TraesCS5A02G202700.1 | TraesCS5D02G209100.1 | 0.0133 | 0.0500 | 0.2668 | 1623 | 413.3333 | 1209.6667 | 16.0000 | 20.0000 | 0.0132 | 0.0484 |
| TraesCS5B02G201200.1 | TraesCS5D02G209100.1 | 0.0083 | 0.0603 | 0.1379 | 1623 | 414.0000 | 1209.0000 | 10.0000 | 24.0000 | 0.0083 | 0.0580 |
| TraesCS1A02G426300.1 | TraesCS1B02G460600.1 | 0.0079 | 0.1113 | 0.0708 | 1545 | 396.3333 | 1148.6667 | 9.0000 | 41.0000 | 0.0078 | 0.1034 |
| TraesCS1A02G426300.1 | TraesCS1D02G435800.1 | 0.0132 | 0.0687 | 0.1918 | 1545 | 396.1667 | 1148.8333 | 15.0000 | 26.0000 | 0.0131 | 0.0656 |
| TraesCS2A02G188700.1 | TraesCS2B02G218300.1 | 0.1691 | 0.3959 | 0.4271 | 1527 | 402.0000 | 1125.0000 | 170.3333 | 123.6667 | 0.1514 | 0.3076 |
| TraesCS2B02G218300.1 | TraesCS2D02G198700.1 | 0.0114 | 0.0445 | 0.2567 | 1563 | 416.5000 | 1146.5000 | 13.0000 | 18.0000 | 0.0113 | 0.0432 |
| TraesCS2A02G188600.1 | TraesCS2B02G218600.1 | 0.1726 | 0.3908 | 0.4416 | 1521 | 395.5833 | 1125.4167 | 173.5000 | 120.5000 | 0.1542 | 0.3046 |
| TraesCS2B02G218700.1 | TraesCS2D02G198900.1 | 0.1986 | 0.4289 | 0.4630 | 1575 | 408.6667 | 1166.3333 | 203.5000 | 133.5000 | 0.1745 | 0.3267 |
| TraesCS2A02G373200.1 | TraesCS2B02G390300.1 | 0.0025 | 0.1337 | 0.0186 | 1611 | 400.0833 | 1210.9167 | 3.0000 | 49.0000 | 0.0025 | 0.1225 |
| TraesCS2B02G390300.1 | TraesCS2D02G369400.1 | 0.0008 | 0.1160 | 0.0071 | 1611 | 400.0000 | 1211.0000 | 1.0000 | 43.0000 | 0.0008 | 0.1075 |
| TraesCS2B02G593500.1 | TraesCS2D02G564100.1 | 0.0234 | 0.0944 | 0.2481 | 1566 | 424.5000 | 1141.5000 | 26.3333 | 37.6667 | 0.0231 | 0.0887 |
| TraesCS2A02G188700.1 | TraesCS2D02G198700.1 | 0.1658 | 0.3951 | 0.4197 | 1527 | 402.9167 | 1124.0833 | 167.2500 | 123.7500 | 0.1488 | 0.3071 |
| TraesCS1B02G460600.1 | TraesCS1D02G435800.1 | 0.0096 | 0.1411 | 0.0680 | 1551 | 396.5000 | 1154.5000 | 11.0000 | 51.0000 | 0.0095 | 0.1286 |
| TraesCS2A02G188600.1 | TraesCS2D02G198900.1 | 0.1759 | 0.3958 | 0.4443 | 1521 | 395.0833 | 1125.9167 | 176.5000 | 121.5000 | 0.1568 | 0.3075 |
| TraesCS2A02G373200.1 | TraesCS2D02G369400.1 | 0.0017 | 0.0987 | 0.0168 | 1611 | 400.2500 | 1210.7500 | 2.0000 | 37.0000 | 0.0017 | 0.0924 |
| TraesCS4A02G042000.1 | TraesCS4B02G262800.1 | 0.0154 | 0.0861 | 0.1794 | 1557 | 411.9167 | 1145.0833 | 17.5000 | 33.5000 | 0.0153 | 0.0813 |
| TraesCS4A02G042000.1 | TraesCS4D02G262900.1 | 0.0119 | 0.0727 | 0.1635 | 1557 | 411.5833 | 1145.4167 | 13.5000 | 28.5000 | 0.0118 | 0.0692 |
| TraesCS4B02G062900.1 | TraesCS4D02G061900.1 | 0.0058 | 0.0559 | 0.1040 | 1425 | 389.5833 | 1035.4167 | 6.0000 | 21.0000 | 0.0058 | 0.0539 |
| TraesCS4B02G262800.1 | TraesCS4D02G262900.1 | 0.0128 | 0.0917 | 0.1391 | 1557 | 411.1667 | 1145.8333 | 14.5000 | 35.5000 | 0.0127 | 0.0863 |
| TraesCS5A02G440100.1 | TraesCS5B02G443900.1 | 0.0220 | 0.0726 | 0.3028 | 1512 | 404.5000 | 1107.5000 | 24.0000 | 28.0000 | 0.0217 | 0.0692 |
| TraesCS5A02G440100.1 | TraesCS5D02G447300.1 | 0.0155 | 0.0696 | 0.2227 | 1515 | 406.4167 | 1108.5833 | 17.0000 | 27.0000 | 0.0153 | 0.0664 |
| TraesCS5B02G443900.1 | TraesCS5D02G447300.1 | 0.0146 | 0.0589 | 0.2478 | 1512 | 405.7500 | 1106.2500 | 16.0000 | 23.0000 | 0.0145 | 0.0567 |
| TraesCS7A02G154500.1 | TraesCS7B02G058500.1 | 0.0116 | 0.0925 | 0.1254 | 1542 | 413.5000 | 1128.5000 | 13.0000 | 36.0000 | 0.0115 | 0.0871 |
| TraesCS7A02G154500.1 | TraesCS7D02G154700.1 | 0.0125 | 0.0895 | 0.1399 | 1542 | 414.7500 | 1127.2500 | 14.0000 | 35.0000 | 0.0124 | 0.0844 |
| TraesCS7A02G430500.1 | TraesCS7B02G330800.1 | 0.0312 | 0.0714 | 0.4376 | 1419 | 389.2500 | 1029.7500 | 31.5000 | 26.5000 | 0.0306 | 0.0681 |
| TraesCS7A02G430500.1 | TraesCS7D02G422500.1 | 0.0297 | 0.0933 | 0.3178 | 1419 | 387.4167 | 1031.5833 | 30.0000 | 34.0000 | 0.0291 | 0.0878 |
| TraesCS7B02G058500.1 | TraesCS7D02G154700.1 | 0.0125 | 0.0735 | 0.1704 | 1542 | 414.4167 | 1127.5833 | 14.0000 | 29.0000 | 0.0124 | 0.0700 |
| TraesCS7B02G330800.1 | TraesCS7D02G422500.1 | 0.0267 | 0.0845 | 0.3153 | 1419 | 387.8333 | 1031.1667 | 27.0000 | 31.0000 | 0.0262 | 0.0799 |
| TraesCS1A02G064900.1 | TraesCS1D02G065700.1 | 0.0133 | 0.1269 | 0.1050 | 1572 | 398.3333 | 1173.6667 | 15.5000 | 46.5000 | 0.0132 | 0.1167 |
| TraesCS2A02G205500.1 | TraesCS2B02G232900.1 | 0.0042 | 0.0722 | 0.0586 | 1578 | 392.3333 | 1185.6667 | 5.0000 | 27.0000 | 0.0042 | 0.0688 |
| TraesCS2A02G259500.1 | TraesCS2B02G282400.1 | 0.0035 | 0.0948 | 0.0365 | 1551 | 393.0000 | 1158.0000 | 4.0000 | 35.0000 | 0.0035 | 0.0891 |
| TraesCS2A02G340600.1 | TraesCS2B02G338400.1 | 0.0062 | 0.0521 | 0.1192 | 1530 | 397.5000 | 1132.5000 | 7.0000 | 20.0000 | 0.0062 | 0.0503 |
| TraesCS2A02G340600.1 | TraesCS2D02G318200.1 | 0.0071 | 0.0684 | 0.1038 | 1530 | 397.6667 | 1132.3333 | 8.0000 | 26.0000 | 0.0071 | 0.0654 |
| TraesCS2A02G340700.1 | TraesCS2B02G338500.1 | 0.0133 | 0.0872 | 0.1522 | 1542 | 401.0000 | 1141.0000 | 15.0000 | 33.0000 | 0.0131 | 0.0823 |
| TraesCS2A02G340700.1 | TraesCS2D02G318300.1 | 0.0142 | 0.0899 | 0.1575 | 1542 | 401.2500 | 1140.7500 | 16.0000 | 34.0000 | 0.0140 | 0.0847 |
| TraesCS2B02G338400.1 | TraesCS2D02G318200.1 | 0.0044 | 0.0575 | 0.0770 | 1530 | 397.5000 | 1132.5000 | 5.0000 | 22.0000 | 0.0044 | 0.0553 |
| TraesCS1A02G219500.1 | TraesCS1B02G232900.1 | 0.0140 | 0.1463 | 0.0957 | 1530 | 376.2500 | 1153.7500 | 16.0000 | 50.0000 | 0.0139 | 0.1329 |
| TraesCS1A02G219500.1 | TraesCS1D02G221100.1 | 0.0153 | 0.1572 | 0.0976 | 1530 | 377.2500 | 1152.7500 | 17.5000 | 53.5000 | 0.0152 | 0.1418 |
| TraesCS1A02G219500.1 | TraesCS4D02G365800.1 | 0.1104 | 0.8719 | 0.1266 | 1515 | 376.6667 | 1138.3333 | 116.8333 | 194.1667 | 0.1026 | 0.5155 |
| TraesCS1A02G219500.1 | TraesCS5A02G542600.2 | 0.1181 | 0.9007 | 0.1311 | 1524 | 377.0000 | 1147.0000 | 125.3333 | 197.6667 | 0.1093 | 0.5243 |
| TraesCS2B02G338600.1 | TraesCS2D02G318300.1 | 0.1847 | 0.5671 | 0.3257 | 1362 | 350.1667 | 1011.8333 | 165.6667 | 139.3333 | 0.1637 | 0.3979 |
| TraesCS3A02G102800.1 | TraesCS3B02G120300.1 | 0.0158 | 0.0950 | 0.1662 | 1383 | 358.6667 | 1024.3333 | 16.0000 | 32.0000 | 0.0156 | 0.0892 |
| TraesCS3A02G102800.1 | TraesCS3D02G105000.1 | 0.0166 | 0.1383 | 0.1197 | 1530 | 399.8333 | 1130.1667 | 18.5000 | 50.5000 | 0.0164 | 0.1263 |
| TraesCS1A02G341100.1 | TraesCS1B02G353800.1 | 0.0113 | 0.0749 | 0.1515 | 1533 | 378.6667 | 1154.3333 | 13.0000 | 27.0000 | 0.0113 | 0.0713 |
| TraesCS1A02G341100.1 | TraesCS1D02G343200.1 | 0.0061 | 0.0546 | 0.1116 | 1533 | 379.8333 | 1153.1667 | 7.0000 | 20.0000 | 0.0061 | 0.0527 |
| TraesCS3A02G475200.1 | TraesCS3B02G518800.1 | 0.0088 | 0.1399 | 0.0631 | 1524 | 384.0000 | 1140.0000 | 10.0000 | 49.0000 | 0.0088 | 0.1276 |
| TraesCS3B02G120300.1 | TraesCS3D02G105000.1 | 0.0198 | 0.1570 | 0.1262 | 1383 | 360.0000 | 1023.0000 | 20.0000 | 51.0000 | 0.0196 | 0.1417 |
| TraesCS4A02G066200.1 | TraesCS4B02G243500.1 | 0.0052 | 0.1110 | 0.0470 | 1542 | 387.6667 | 1154.3333 | 6.0000 | 40.0000 | 0.0052 | 0.1032 |
| TraesCS4A02G066200.1 | TraesCS4D02G243100.1 | 0.0035 | 0.0845 | 0.0411 | 1542 | 387.7500 | 1154.2500 | 4.0000 | 31.0000 | 0.0035 | 0.0799 |
| TraesCS4A02G314900.1 | TraesCS5D02G558100.1 | 0.0309 | 0.2804 | 0.1104 | 1512 | 374.0000 | 1138.0000 | 34.5000 | 87.5000 | 0.0303 | 0.2340 |
| TraesCS4A02G384900.1 | TraesCS7A02G085900.1 | 0.0174 | 0.1471 | 0.1186 | 1539 | 408.0833 | 1130.9167 | 19.5000 | 54.5000 | 0.0172 | 0.1336 |
| TraesCS1B02G232900.1 | TraesCS1D02G221100.1 | 0.0197 | 0.1311 | 0.1506 | 1563 | 382.5000 | 1180.5000 | 23.0000 | 46.0000 | 0.0195 | 0.1203 |
| TraesCS1B02G232900.1 | TraesCS4D02G365800.1 | 0.1374 | 0.8243 | 0.1667 | 1554 | 384.2500 | 1169.7500 | 146.8333 | 192.1667 | 0.1255 | 0.5001 |
| TraesCS1B02G232900.1 | TraesCS5A02G542600.2 | 0.1346 | 0.8435 | 0.1595 | 1548 | 381.7500 | 1166.2500 | 143.6667 | 193.3333 | 0.1232 | 0.5064 |
| TraesCS4B02G243500.1 | TraesCS4D02G243100.1 | 0.0017 | 0.0647 | 0.0268 | 1542 | 387.4167 | 1154.5833 | 2.0000 | 24.0000 | 0.0017 | 0.0619 |
| TraesCS4B02G346400.1 | TraesCS4D02G341400.1 | 0.0102 | 0.1028 | 0.0993 | 1545 | 411.0000 | 1134.0000 | 11.5000 | 39.5000 | 0.0101 | 0.0961 |
| TraesCS4B02G346400.1 | TraesCS5A02G515200.1 | 0.0115 | 0.1045 | 0.1105 | 1545 | 410.1667 | 1134.8333 | 13.0000 | 40.0000 | 0.0115 | 0.0975 |
| TraesCS4D02G341400.1 | TraesCS5A02G515200.1 | 0.0053 | 0.0849 | 0.0626 | 1545 | 411.3333 | 1133.6667 | 6.0000 | 33.0000 | 0.0053 | 0.0802 |
| TraesCS1D02G221100.1 | TraesCS4D02G365800.1 | 0.1331 | 0.8756 | 0.1520 | 1557 | 385.5000 | 1171.5000 | 142.8333 | 199.1667 | 0.1219 | 0.5166 |
| TraesCS4D02G365800.1 | TraesCS5A02G542600.2 | 0.0068 | 0.0895 | 0.0759 | 1575 | 391.3333 | 1183.6667 | 8.0000 | 33.0000 | 0.0068 | 0.0843 |
| TraesCS5A02G001100.1 | TraesCS5B02G001000.1 | 0.0170 | 0.2041 | 0.0834 | 1548 | 388.9167 | 1159.0833 | 19.5000 | 69.5000 | 0.0168 | 0.1787 |
| TraesCS5A02G001100.1 | TraesCS5D02G001600.1 | 0.0161 | 0.2454 | 0.0658 | 1548 | 389.4167 | 1158.5833 | 18.5000 | 81.5000 | 0.0160 | 0.2093 |
| TraesCS5A02G182600.1 | TraesCS5B02G180800.1 | 0.0069 | 0.0812 | 0.0848 | 1584 | 416.0000 | 1168.0000 | 8.0000 | 32.0000 | 0.0068 | 0.0769 |
| TraesCS5A02G182600.1 | TraesCS5D02G187100.1 | 0.0069 | 0.0703 | 0.0978 | 1587 | 417.3333 | 1169.6667 | 8.0000 | 28.0000 | 0.0068 | 0.0671 |
| TraesCS5A02G226500.1 | TraesCS5B02G225100.1 | 0.0052 | 0.0659 | 0.0785 | 1560 | 396.4167 | 1163.5833 | 6.0000 | 25.0000 | 0.0052 | 0.0631 |
| TraesCS5A02G226500.1 | TraesCS5D02G233900.1 | 0.0043 | 0.0523 | 0.0824 | 1560 | 396.1667 | 1163.8333 | 5.0000 | 20.0000 | 0.0043 | 0.0505 |
| TraesCS1B02G353800.1 | TraesCS1D02G343200.1 | 0.0070 | 0.0750 | 0.0929 | 1533 | 378.5000 | 1154.5000 | 8.0000 | 27.0000 | 0.0069 | 0.0713 |
| TraesCS1D02G221100.1 | TraesCS5A02G542600.2 | 0.1342 | 0.8914 | 0.1506 | 1554 | 383.8333 | 1170.1667 | 143.8333 | 200.1667 | 0.1229 | 0.5215 |
| TraesCS5B02G001000.1 | TraesCS5D02G001600.1 | 0.0139 | 0.1744 | 0.0799 | 1551 | 392.0000 | 1159.0000 | 16.0000 | 61.0000 | 0.0138 | 0.1556 |
| TraesCS5B02G180800.1 | TraesCS5D02G187100.1 | 0.0034 | 0.0679 | 0.0506 | 1584 | 416.1667 | 1167.8333 | 4.0000 | 27.0000 | 0.0034 | 0.0649 |
| TraesCS5B02G225100.1 | TraesCS5D02G233900.1 | 0.0060 | 0.0550 | 0.1097 | 1560 | 395.7500 | 1164.2500 | 7.0000 | 21.0000 | 0.0060 | 0.0531 |
| TraesCS5B02G225300.1 | TraesCS5D02G234100.1 | 0.0061 | 0.0856 | 0.0710 | 1539 | 383.0000 | 1156.0000 | 7.0000 | 31.0000 | 0.0061 | 0.0809 |
| TraesCS6A02G134000.1 | TraesCS6B02G162200.1 | 0.0086 | 0.0386 | 0.2225 | 1569 | 398.5000 | 1170.5000 | 10.0000 | 15.0000 | 0.0085 | 0.0376 |
| TraesCS6A02G134000.1 | TraesCS6D02G123300.1 | 0.0069 | 0.0386 | 0.1778 | 1569 | 398.5000 | 1170.5000 | 8.0000 | 15.0000 | 0.0068 | 0.0376 |
| TraesCS6B02G162200.1 | TraesCS6D02G123300.1 | 0.0051 | 0.0440 | 0.1170 | 1569 | 398.1667 | 1170.8333 | 6.0000 | 17.0000 | 0.0051 | 0.0427 |
| TraesCS7B02G185800.1 | TraesCS7D02G286600.1 | 0.0026 | 0.0905 | 0.0290 | 1533 | 387.0833 | 1145.9167 | 3.0000 | 33.0000 | 0.0026 | 0.0853 |
| TraesCS2A02G483400.1 | TraesCS2B02G509700.1 | 0.0111 | 0.1124 | 0.0991 | 1548 | 416.8333 | 1131.1667 | 12.5000 | 43.5000 | 0.0111 | 0.1044 |
| TraesCS2B02G509700.1 | TraesCS2D02G483300.1 | 0.0138 | 0.0800 | 0.1727 | 1548 | 415.2500 | 1132.7500 | 15.5000 | 31.5000 | 0.0137 | 0.0759 |
| TraesCS2A02G484000.1 | TraesCS2B02G510000.1 | 0.1302 | 0.5327 | 0.2444 | 1545 | 398.5833 | 1146.4167 | 137.0000 | 152.0000 | 0.1195 | 0.3814 |
| TraesCS2A02G204900.1 | TraesCS2D02G211100.1 | 0.0034 | 0.0608 | 0.0563 | 1581 | 410.6667 | 1170.3333 | 4.0000 | 24.0000 | 0.0034 | 0.0584 |
| TraesCS2B02G232400.1 | TraesCS2D02G211100.1 | 0.0064 | 0.0677 | 0.0949 | 1581 | 409.3333 | 1171.6667 | 7.5000 | 26.5000 | 0.0064 | 0.0647 |
| TraesCS2A02G483400.1 | TraesCS2D02G483300.1 | 0.0157 | 0.1184 | 0.1322 | 1545 | 415.4167 | 1129.5833 | 17.5000 | 45.5000 | 0.0155 | 0.1095 |
| TraesCS2A02G484000.1 | TraesCS2D02G483500.1 | 0.1285 | 0.5138 | 0.2501 | 1545 | 396.0833 | 1148.9167 | 135.6667 | 147.3333 | 0.1181 | 0.3720 |
| TraesCS2A02G204900.1 | TraesCS2B02G232400.1 | 0.0060 | 0.0743 | 0.0808 | 1581 | 410.0000 | 1171.0000 | 7.0000 | 29.0000 | 0.0060 | 0.0707 |
| TraesCS1B02G211800.1 | TraesCS1D02G200700.1 | 0.0018 | 0.0341 | 0.0536 | 1485 | 390.0000 | 1095.0000 | 2.0000 | 13.0000 | 0.0018 | 0.0333 |
| TraesCS5A02G484700.1 | TraesCS5D02G498200.1 | 0.0057 | 0.0379 | 0.1502 | 1695 | 460.1667 | 1234.8333 | 7.0000 | 17.0000 | 0.0057 | 0.0369 |
